# Supplementary material
Source: HighWire-hosted journal article supplement (https://svn.smart01.highwire.org/content/8/3/197)
Supplement: inline-supplementary-material-1 [file inline-supplementary-material-1.pdf]

## Supplemental Material

Table S1. Differential expression profile.

| Gene Symbol | KRAS 1 | KRAS 2 | KRAS 3 | CTRL 1 | CTRL 2 | CTRL 3 | FC       | p value  |
|-------------|--------|--------|--------|--------|--------|--------|----------|----------|
| CD34        | 2.78   | 3.71   | 3.99   | 105.27 | 103.21 | 112.91 | 0.032608 | 0.000688 |
| SELP        | 0.06   | 0.09   | 0.21   | 2.43   | 1.8    | 1.98   | 0.057971 | 0.006521 |
| CLDN3       | 0.19   | 0.17   | 0.06   | 2.7    | 2.59   | 2.39   | 0.054688 | 0.000262 |
| EMCN        | 4.99   | 5.09   | 5.62   | 71.93  | 79.63  | 75.76  | 0.069066 | 0.000916 |
| JUP         | 25.68  | 41.6   | 34.55  | 287.51 | 277.68 | 279.08 | 0.120613 | 0.000006 |
| LMO2        | 5.33   | 6.45   | 6.18   | 38.12  | 35.47  | 35.23  | 0.165043 | 0.002893 |
| CXADR       | 0.83   | 0.73   | 0.59   | 2.27   | 3.09   | 2.82   | 0.262836 | 0.009590 |
| VWF         | 120.89 | 169.09 | 151.46 | 735.51 | 818.25 | 837.84 | 0.184579 | 0.000513 |
| SELE        | 0.12   | 0.19   | 0.15   | 0.53   | 0.55   | 0.79   | 0.245989 | 0.024812 |
| GPR116      | 3.69   | 6.77   | 6.23   | 25.91  | 30.51  | 34.77  | 0.183024 | 0.005277 |
| VCAM1       | 0.08   | 0.15   | 0.07   | 0.54   | 0.39   | 0.57   | 0.200000 | 0.009082 |
| SOX18       | 27.61  | 25.78  | 22.21  | 109.16 | 100.69 | 99.73  | 0.244202 | 0.000165 |
| TP53        | 10.92  | 15.23  | 13.09  | 49.57  | 49.25  | 57.8   | 0.250543 | 0.013516 |
| FLI1        | 32.37  | 41.76  | 37.75  | 135.21 | 139.09 | 159.53 | 0.257889 | 0.002122 |
| KRT19       | 24.97  | 20.38  | 19.89  | 86.97  | 82.35  | 76.5   | 0.265397 | 0.000363 |
| KDR         | 19.17  | 27.52  | 25.46  | 84.29  | 99.13  | 104.84 | 0.250295 | 0.002824 |
| MTUS1       | 26.39  | 32.91  | 30.24  | 80.4   | 88.24  | 93.1   | 0.342095 | 0.000851 |
| LYVE1       | 2.37   | 5.02   | 3.2    | 10.63  | 9.78   | 11.5   | 0.331871 | 0.002974 |
| CAV1        | 243.98 | 271.89 | 276.2  | 526.92 | 543.02 | 581.02 | 0.479763 | 0.000326 |
| CDH5        | 174.44 | 190.03 | 183.27 | 404.63 | 427.82 | 444.67 | 0.428887 | 0.000696 |
| ICAM2       | 260.54 | 243.75 | 230.44 | 650.95 | 571.68 | 552.96 | 0.413795 | 0.004524 |
| TIE1        | 247.88 | 265.89 | 264.02 | 427.84 | 430.15 | 453.18 | 0.593203 | 0.000119 |
| TJP1        | 12.8   | 14.72  | 14.52  | 19.69  | 22.43  | 25     | 0.626341 | 0.020490 |
| SOX7        | 19.8   | 19.57  | 19.08  | 30.29  | 33.62  | 35.75  | 0.586494 | 0.011984 |
| EGFL7       | 619.84 | 550.46 | 539.99 | 948.31 | 854.67 | 791.48 | 0.659208 | 0.009872 |
| TAGLN       | 20.72  | 19.46  | 18.27  | 8.31   | 7.4    | 6.61   | 2.618728 | 0.000305 |
| NEXN        | 10.82  | 12.33  | 10.89  | 4.94   | 7.63   | 5.66   | 1.867252 | 0.008621 |
| NT5E        | 152.88 | 175.22 | 182.04 | 91.03  | 97.93  | 106.35 | 1.727473 | 0.005686 |
| CDH2        | 16.29  | 15.65  | 15.94  | 9.43   | 11.01  | 11.09  | 1.518554 | 0.000744 |
| SPOCK1      | 74.74  | 93.35  | 89.57  | 41.91  | 56.97  | 55.51  | 1.668890 | 0.010465 |
| SRF         | 32.2   | 37.31  | 36.6   | 19.38  | 18.92  | 21.3   | 1.780369 | 0.004006 |
| PLAU        | 39.06  | 41.15  | 41.57  | 27.43  | 25.7   | 25.66  | 1.545628 | 0.000197 |
| AHNAK       | 128.93 | 171.33 | 180.61 | 63.82  | 82.65  | 93.29  | 2.005631 | 0.020056 |
| SRGN        | 996.7  | 907.46 | 907.13 | 518.38 | 477.33 | 456.26 | 1.936190 | 0.000592 |
| MSN         | 526.71 | 585.26 | 599.11 | 254.49 | 276.63 | 293.45 | 2.075118 | 0.001349 |
| ZEB1        | 42.17  | 57.2   | 63.85  | 20.17  | 27.56  | 28.84  | 2.131644 | 0.031349 |
| SERPINE2    | 19.61  | 18.15  | 17.69  | 6.25   | 6.15   | 6.14   | 2.990831 | 0.002137 |
| IGFBP3      | 12.84  | 12.88  | 12.82  | 5.31   | 5.23   | 5.81   | 2.357187 | 0.000541 |
| SMTN        | 140.52 | 132.86 | 129.02 | 59.2   | 57.42  | 54.55  | 2.350879 | 0.000523 |
| PRKCA       | 6.14   | 7.37   | 8.11   | 2.51   | 2.74   | 3.19   | 2.561611 | 0.010092 |
| SNAI1       | 20.35  | 20.54  | 19.94  | 9.49   | 9.82   | 9.72   | 2.095419 | 0.000011 |
| JAG1        | 16.39  | 19.27  | 18.26  | 6.96   | 8.2    | 7.92   | 2.336222 | 0.002242 |
| TWIST2      | 0.9    | 0.99   | 0.89   | 0.59   | 0.19   | 0.39   | 2.376068 | 0.035535 |
| PLAUR       | 183.82 | 161.96 | 167.04 | 50.03  | 43.32  | 45.59  | 3.690946 | 0.001403 |
| KLF4        | 32.84  | 34.07  | 36.1   | 4.63   | 4.51   | 4.13   | 7.762622 | 0.000782 |

|          |         |         |         |        |        |        |           |          |
|----------|---------|---------|---------|--------|--------|--------|-----------|----------|
| PLEK2    | 5.74    | 5.42    | 5.68    | 1.97   | 1.45   | 1.75   | 3.257253  | 0.000085 |
| CTGF     | 848.3   | 776.53  | 759.02  | 135.39 | 126.45 | 137    | 5.976958  | 0.001491 |
| SERPINE1 | 2882.5  | 2733.5  | 2714.01 | 578.74 | 540.88 | 568.17 | 4.935454  | 0.000350 |
| ADAM12   | 0.59    | 1.12    | 0.88    | 0.08   | 0.04   | 0.08   | 12.950000 | 0.034210 |
| PLAT     | 203.08  | 192.17  | 197.34  | 38.7   | 37.65  | 37.44  | 5.207751  | 0.000324 |
| THY1     | 1.24    | 1.92    | 1.5     | 0.05   | 0.11   | 0.11   | 17.259259 | 0.017040 |
| CD44     | 60.42   | 69.61   | 60.54   | 2.07   | 5.09   | 3.17   | 18.448209 | 0.001310 |
| PTX3     | 1377.37 | 1159.73 | 1186.43 | 82.42  | 75     | 69.88  | 16.381566 | 0.003366 |

FC indicates fold change.

Table S2. Primers used for RT-qPCR.

| Primers for genes | Sequence                |
|-------------------|-------------------------|
| CDH5-F            | AAGCGTGAGTCGCAAGAATG    |
| CDH5-R            | TCTCCAGGTTTTTCGCCAGTG   |
| VWF-F             | CCGATGCAGCCTTTTCGGA     |
| VWF-R             | TCCCAAGATACACGGAGAGG    |
| CDH2-F            | TGCGGTACAGTGTAAGTGGG    |
| CDH2-R            | GAAACCGGGCTATCTGCTCG    |
| SNAI2-F           | TGTGACAAGGAATATGTGAGCC  |
| SNAI2-R           | TGAGCCCTCAGATTTGACCTG   |
| NOTCH1-F          | GAGGCGTGGCAGACTATGC     |
| NOTCH1-R          | CTTGTAATCCGTCAGCGTGA    |
| NOTCH2-F          | CAACCGCAATGGAGGCTATG    |
| NOTCH2-R          | GCGAAGGCACAATCATCAATGTT |
| NOTCH3-F          | TGGCGACCTCACTTACGACT    |
| NOTCH3-R          | CACTGGCAGTTATAGGTGTTGAC |
| NOTCH4-F          | TGTGAACGTGATGTCAACGAG   |
| NOTCH4-R          | ACAGTCTGGGCCTATGAAACC   |
| HEY1-F            | GTTCGGCTCTAGGTTCCATGT   |
| HEY1-R            | CGTCGGCGCTTCTCAATTATTC  |
| HEY2-F            | AAGGCGTCGGGATCGGATAA    |
| HEY2-R            | AGAGCGTGTGCGTCAAAGTAG   |
| GAPDH-F           | AATGACCCCTTCATTGAC      |
| GAPDH-R           | TCCACGACGTACTCAGCGC     |

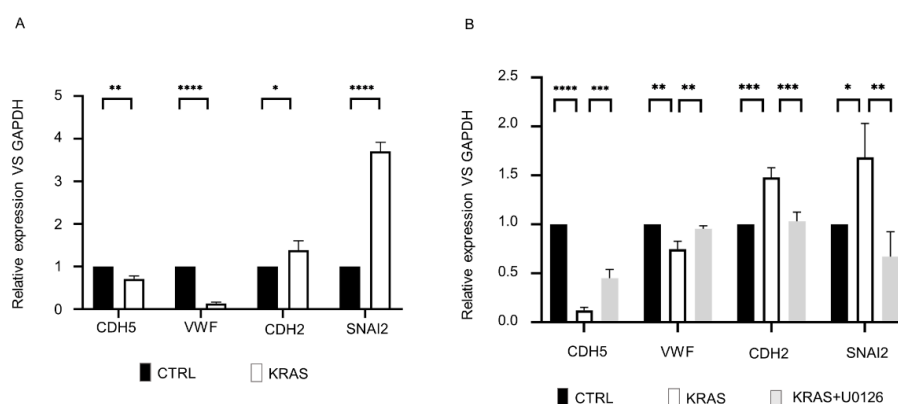

**Figure S1. A,** Expression of endothelial (CDH5, VWF) and mesenchymal markers (CDH2, SNAI2) in HUVECs overexpressing KRAS<sup>G12D</sup> and control adenovirus after 24 hours as shown by real-time PCR (n=3). **B,** Expression of endothelial and mesenchymal markers in HUVECs overexpressing KRAS<sup>G12D</sup>, HUVECs overexpressing KRAS<sup>G12D</sup> treated with U0126 (KRAS+U0126), and control after 48 hours as shown by real-time PCR (n=3). \*P<0.05, \*\*P<0.01, \*\*\*\*P<0.0001.

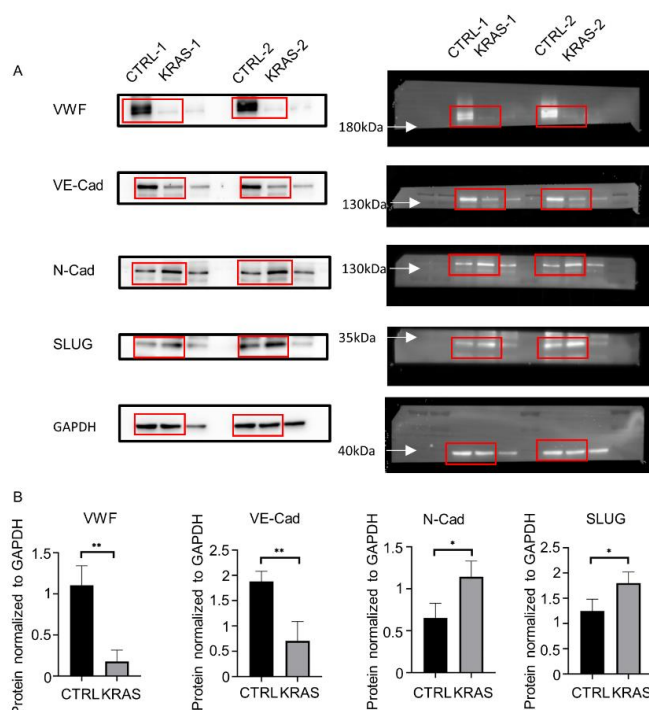

**Figure S2.** Effects of KRAS mutation on EndMT markers at the protein level. **A**, Two additional western blot (left) and full unedited gel (right) image. The red box is the target protein region. **B**, quantification showing decrease in endothelial markers (VWF, VE-Cad) and increase in mesenchymal markers (N-Cad, SLUG) after infected with KRAS mutant adenovirus. \*:  $p \leq 0.05$ , \*\*:  $p \leq 0.01$ .

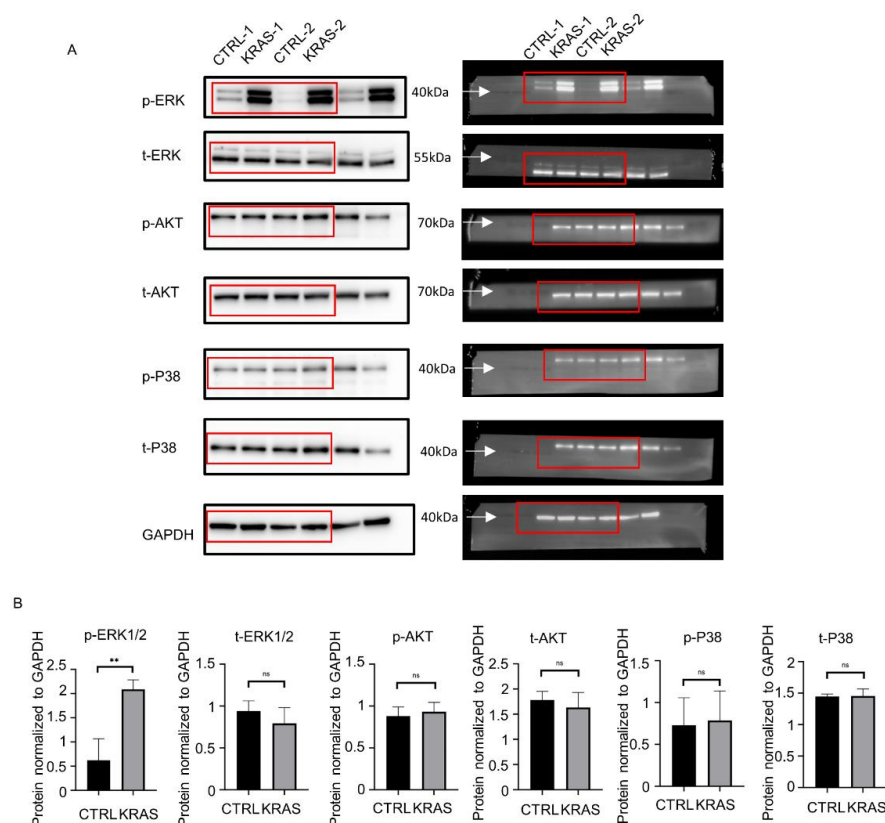

**Figure S3.** Detection of ERK Phosphorylation in KRAS mutant HUVECs. **A**, Two additional western blot (left) and full unedited gel (right) image. The red box is the target protein region. **B**, quantification showing increased phosphorylation of ERK in KRAS mutant HUVECs but not of P38 or AKT. ns:  $p > 0.05$ , \*\*:  $p \leq 0.01$ .

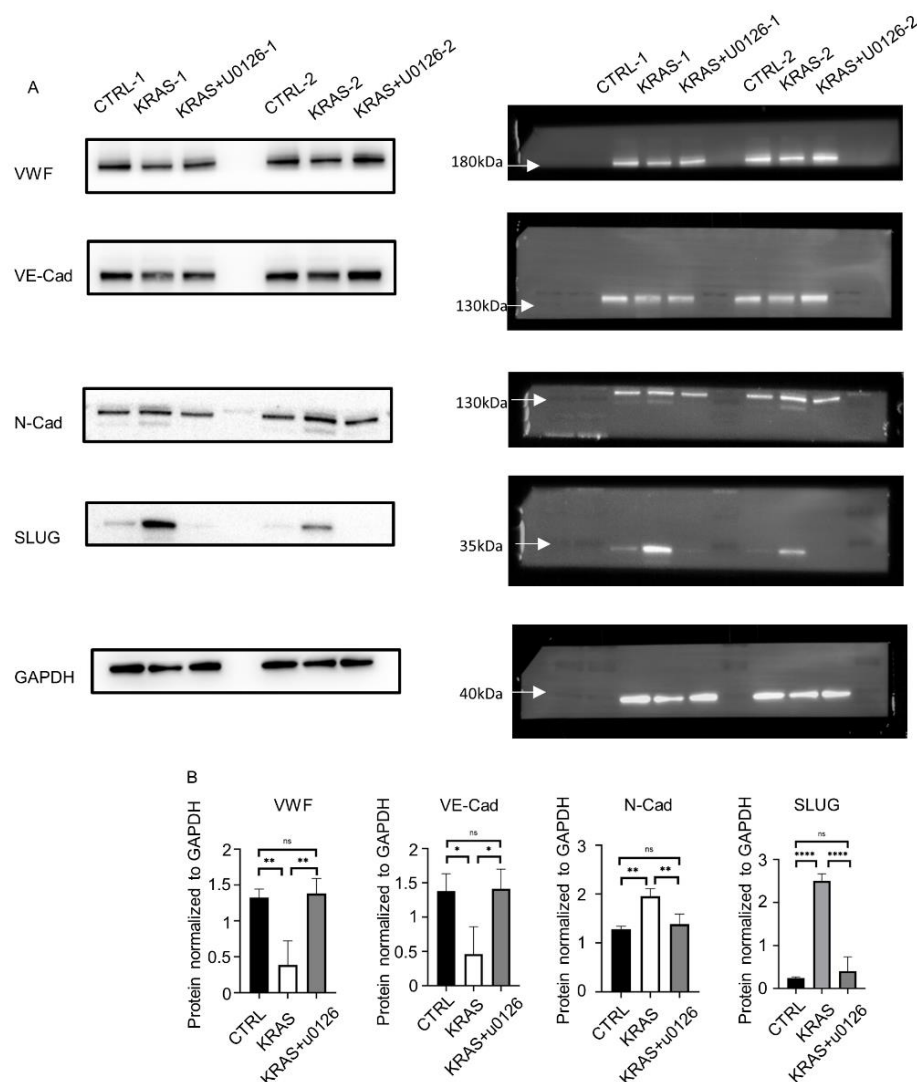

**Figure S4.** Effects of MAPK inhibitor U0126 on EndMT markers in KRAS mutant HUVECs. **A**, Two additional western blot (left) and full unedited gel (right) image. **B**, quantification showing the decrease of endothelial markers (VWF, VE-Cad) and increase of mesenchymal markers (N-Cad, SLUG) by KRAS mutant were reversed by U0126 (KRAS+U0126). ns:  $p > 0.05$ , \*:  $p \leq 0.05$ , \*\*:  $p \leq 0.01$ , \*\*\*\*:  $p \leq 0.0001$ .

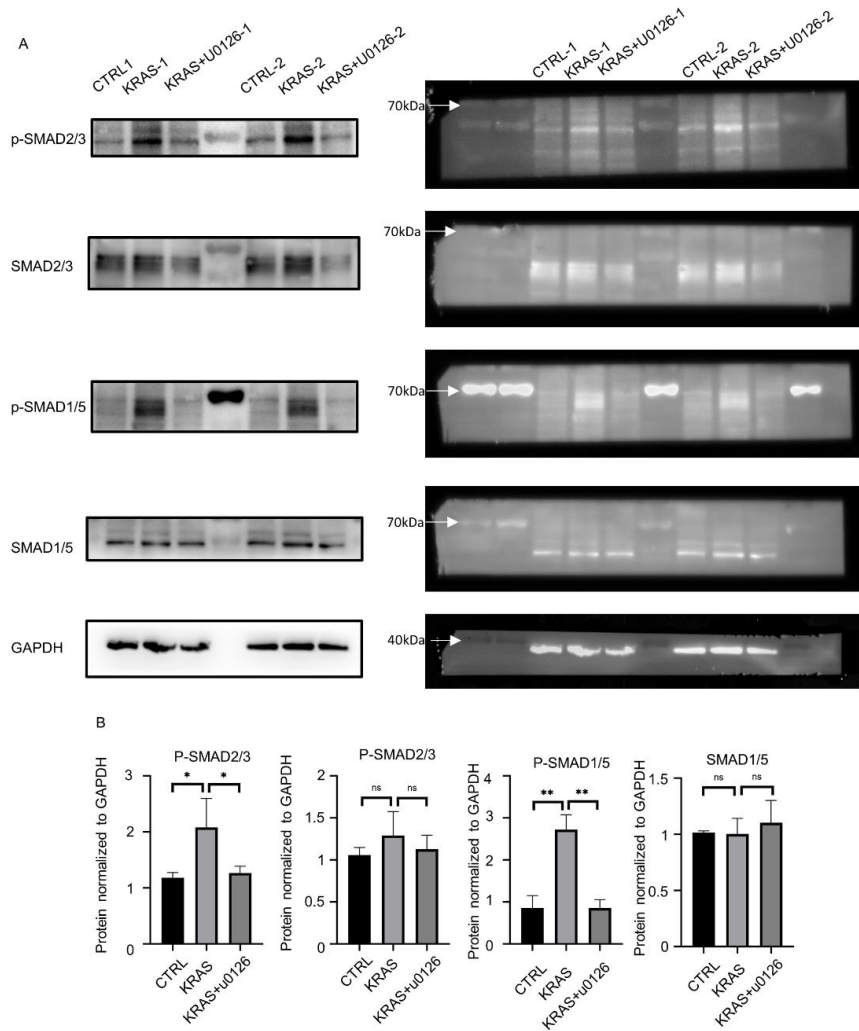

**Figure S5.** Effect of U0126 on SMAD2/3 and SMAD1/5 Phosphorylation in KRAS mutant HUVECs. **A**, Two additional western blot (left) and full unedited gel (right) image. **B**, quantification showing increased phosphorylation of SMAD2/3 and SMAD1/5 in KRAS mutant HUVECs, which was reversed by U0126 (KRAS+U0126). ns:  $p>0.05$ , \*:  $p\leq0.05$ , \*\*:  $p\leq0.01$ .

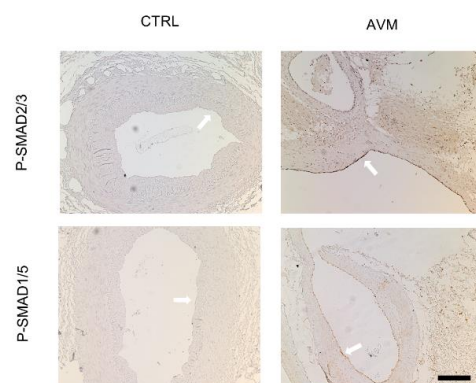

**Figure S6.** Immunohistochemical staining for p-SMAD2/3 or p-SMAD1/5 in bAVM tissue (n=3). The white arrows indicate vascular ECs. The scale bar corresponds to 200  $\mu\text{m}$ .

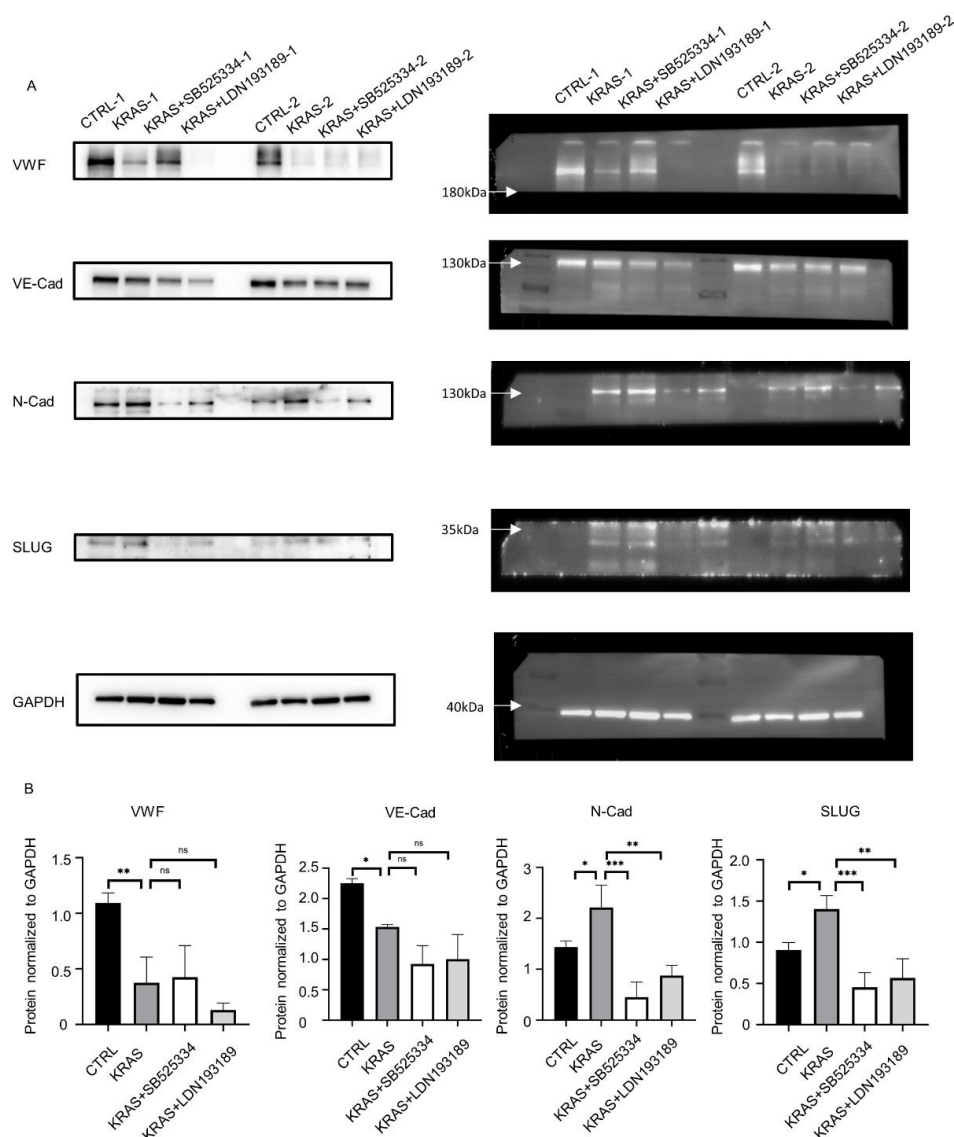

**Figure S7.** Effects of TGF inhibitor (SB525334) and BMP inhibitor (LDN193189) on EndMT markers in KRAS mutant HUVECs. **A**, Two additional western blot (left) and full unedited gel (right) image. **B**, quantification showing the decrease of endothelial markers (VWF, VE-Cad) and increase of mesenchymal markers (N-Cad, SLUG) by KRAS mutant, and only mesenchymal markers were reversed by SB525334 (KRAS+ SB525334) or LDN193189 (KRAS+ LDN193189). ns:  $p > 0.05$ , \*:  $p \leq 0.05$ , \*\*:  $p \leq 0.01$ , \*\*\*:  $p \leq 0.001$ .

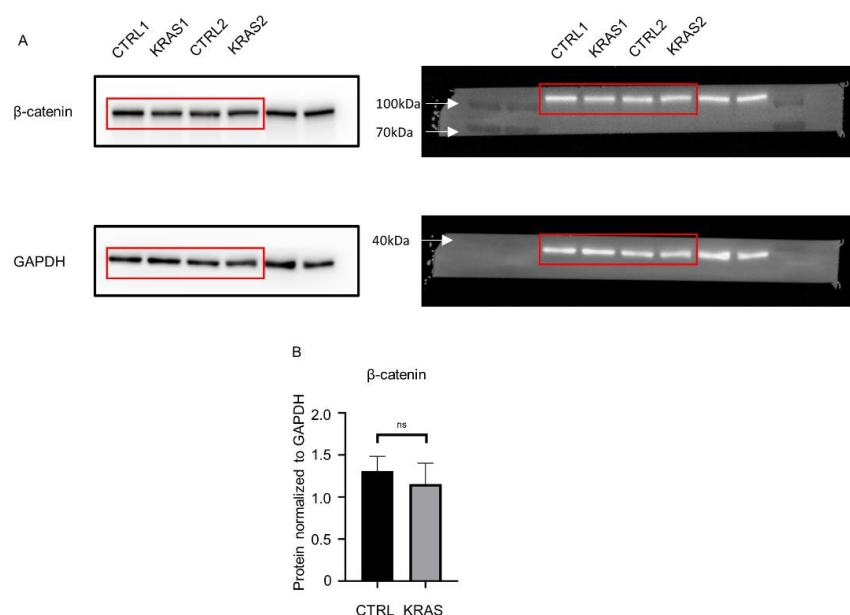

**Figure S8.** Effects of KRAS mutation on  $\beta$ -catenin at the protein level. **A**, Two additional western blot (left) and full unedited gel (right) image. The red box is the target protein region. **B**, quantification showing KRAS mutation had no effect on  $\beta$ -catenin expression. ns:  $p > 0.05$ .

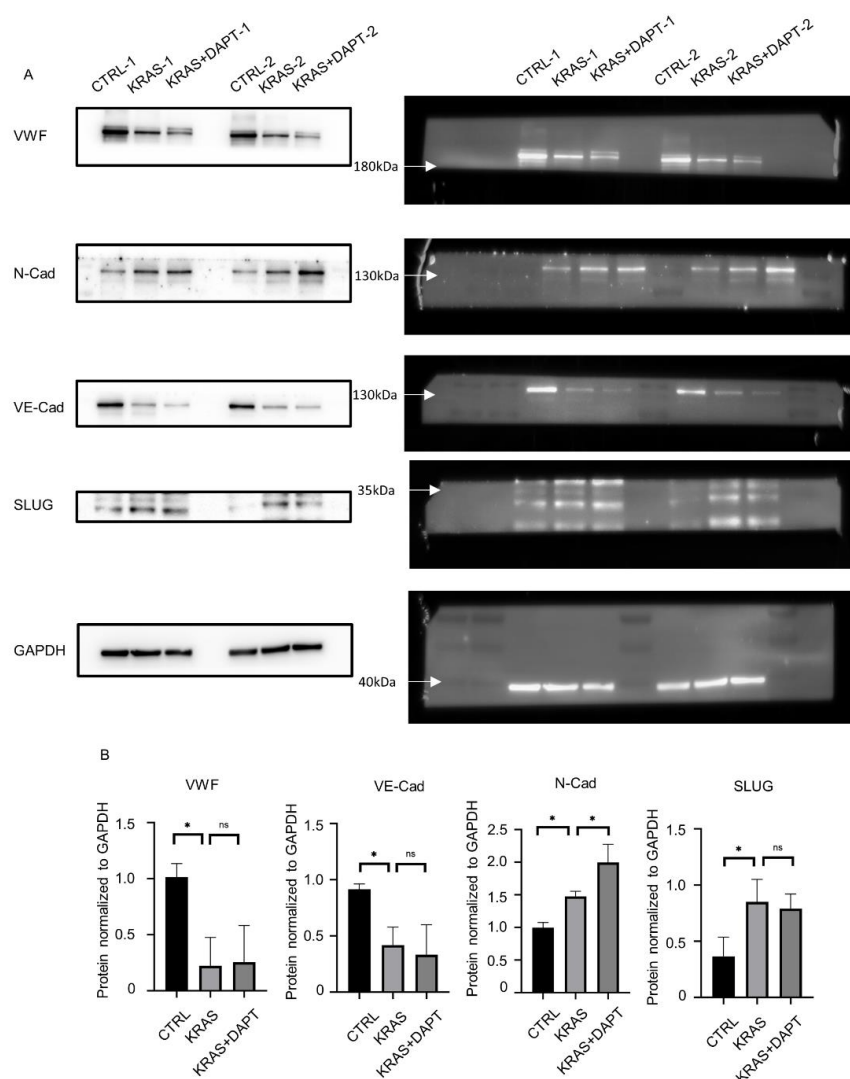

**Figure S9.** Effects of Notch inhibitor DAPT on EndMT markers in KRAS mutant HUVECs. **A**, Two additional western blot (left) and full unedited gel (right) image. **B**, quantification showing the decrease of endothelial markers (VWF, VE-Cad) and increase of mesenchymal markers (N-Cad, SLUG) by KRAS mutant and DAPT (KRAS+DAPT) had no effect on it. ns:  $p > 0.05$ , \*:  $p \leq 0.05$ .

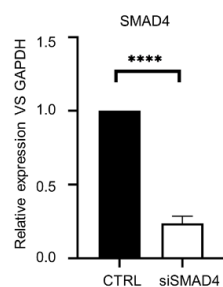

**Figure S10.** Knockdown efficiency of Smad4 by PCR.

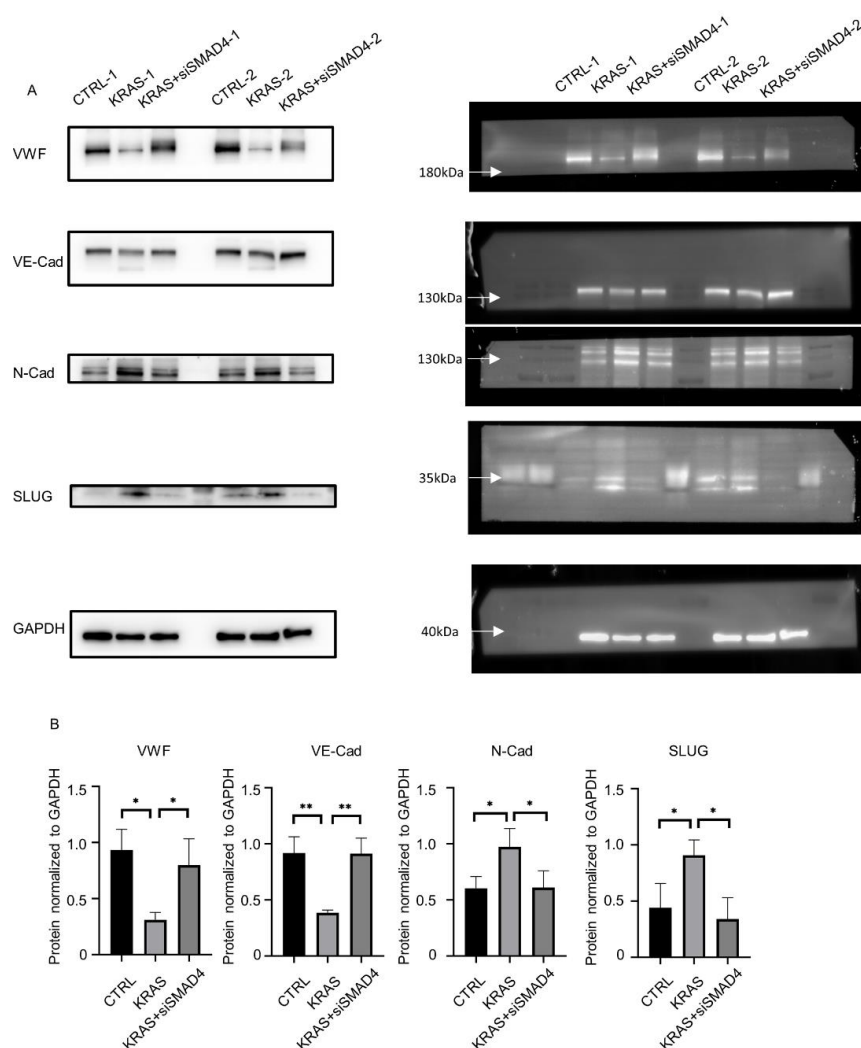

**Figure S11.** Effects of siSMAD4 on EndMT markers in KRAS mutant HUVECs. **A**, Two additional western blot (left) and full unedited gel (right) image. **B**, quantification showing the decrease of endothelial markers (VWF, VE-Cad) and increase of mesenchymal markers (N-Cad, SLUG) by KRAS mutant were reversed by siSMAD4 (KRAS+siSMAD4). \*:  $p \leq 0.05$ , \*\*:  $p \leq 0.01$ .

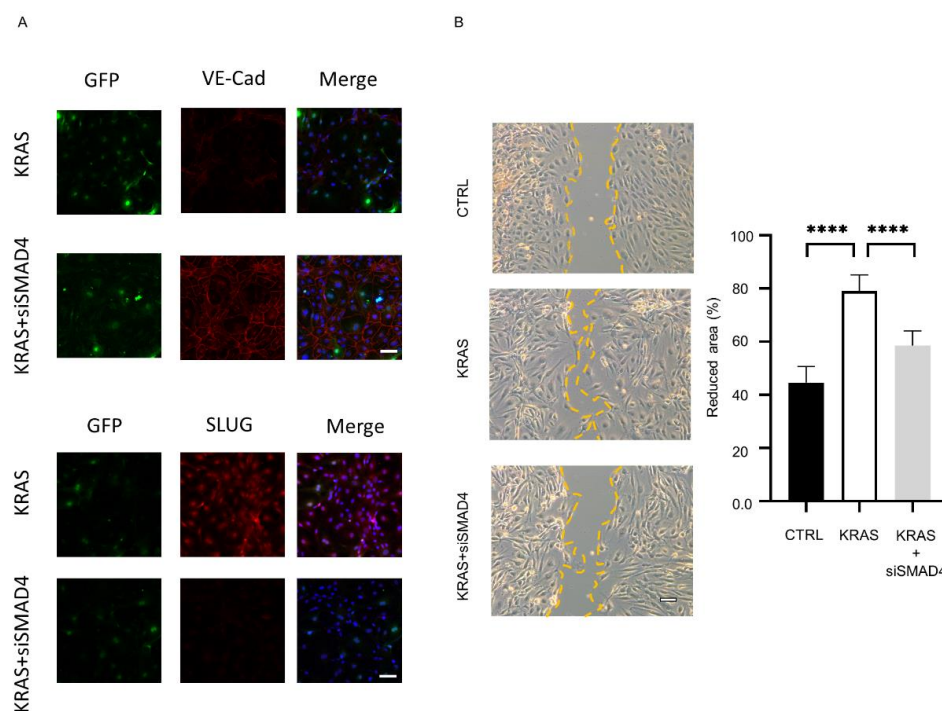

**Figure S12. A,** Immunofluorescence staining for VE-Cadherin and SLUG in KRAS-mutant HUVECs transfected with siSmad4 or siCTRL (n=3). Scale bar: 100  $\mu$ m. **B,** Effects of siSmad4 on KRAS-mutant HUVEC migration (left). The scale bar corresponds to 100  $\mu$ m. The right panel shows the statistical analysis of the reduced area (n=9). The T bars represent standard deviation.

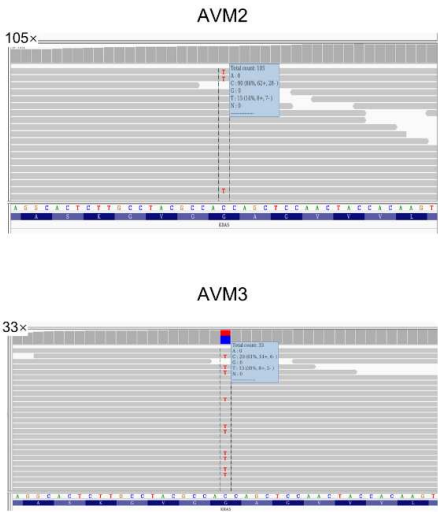

**Figure S13.** Whole exon sequencing for KRAS<sup>G12D</sup> mutation in bAVM endothelial cells.

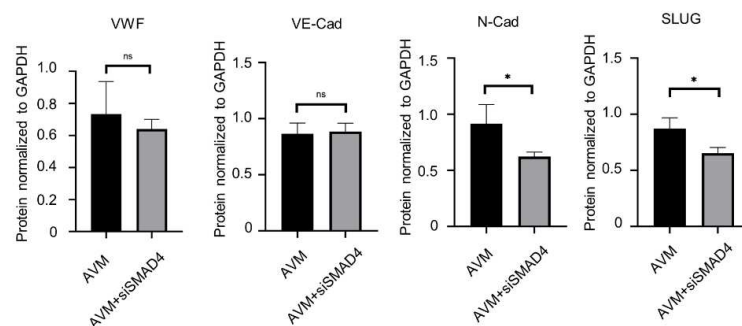

**Figure S14.** Effects of siSMAD4 on EndMT markers in KRAS mutant primary AVM ECs. ns:  $p > 0.05$ , \*:  $p \leq 0.05$ .

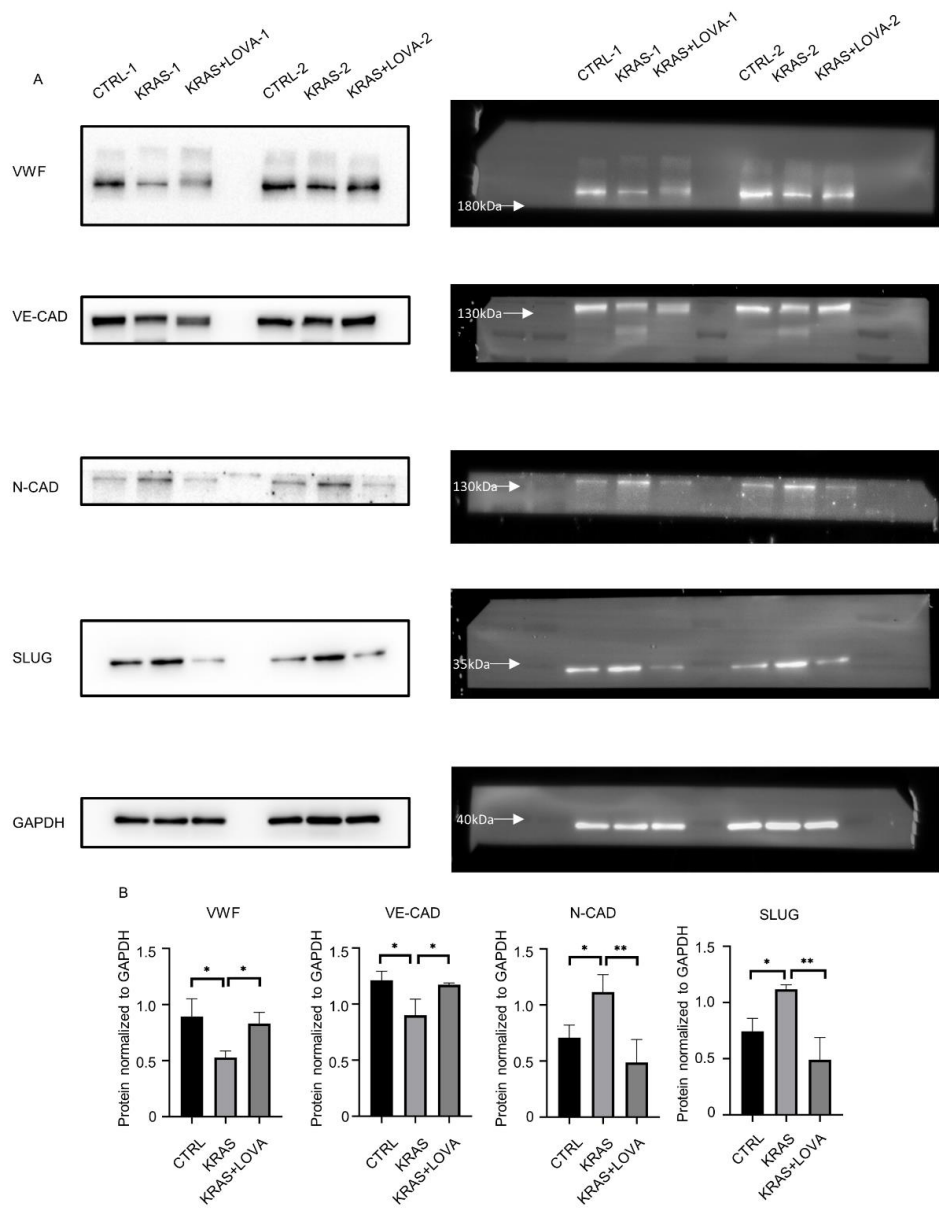

**Figure S15.** Effects of lovastatin (LOVA) on EndMT markers in KRAS mutant HUVECs. **A**, Two additional western blot (left) and full unedited gel (right) image. **B**, quantification showing the decrease of endothelial markers (VWF, VE-Cad) and increase of mesenchymal markers (N-Cad, SLUG) by KRAS mutant were reversed by LOVA (KRAS+LOVA). \*:  $p \leq 0.05$ , \*\*:  $p \leq 0.01$ .

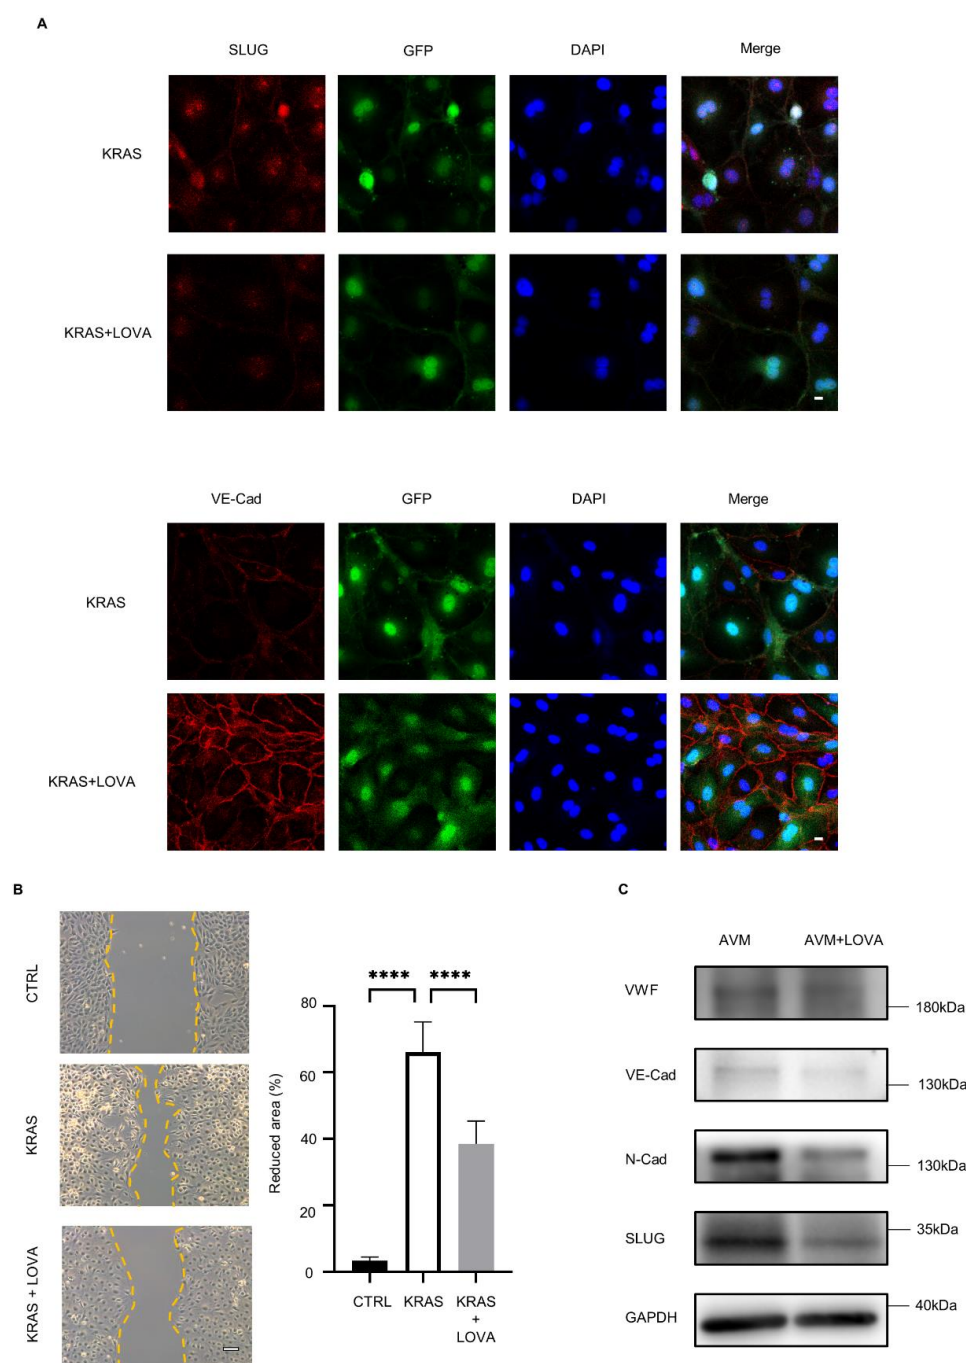

**Figure S16. A,** Immunofluorescence staining for VE-Cadherin and SLUG in KRAS-mutant HUVECs treated with lovastatin or 0.1% DMSO (n=3). Scale bar: 100  $\mu$ m. **B,** Effects of lovastatin on KRAS-mutant HUVEC migration (left). The scale bar corresponds to 100  $\mu$ m. The right panel shows the statistical analysis of the reduced area (n=9). The T bars represent standard deviation. **C,** Western blot showing expression of mesenchymal markers and endothelial markers in KRAS-mutant bAVM ECs and ECs treated with lovastatin (AVM1).

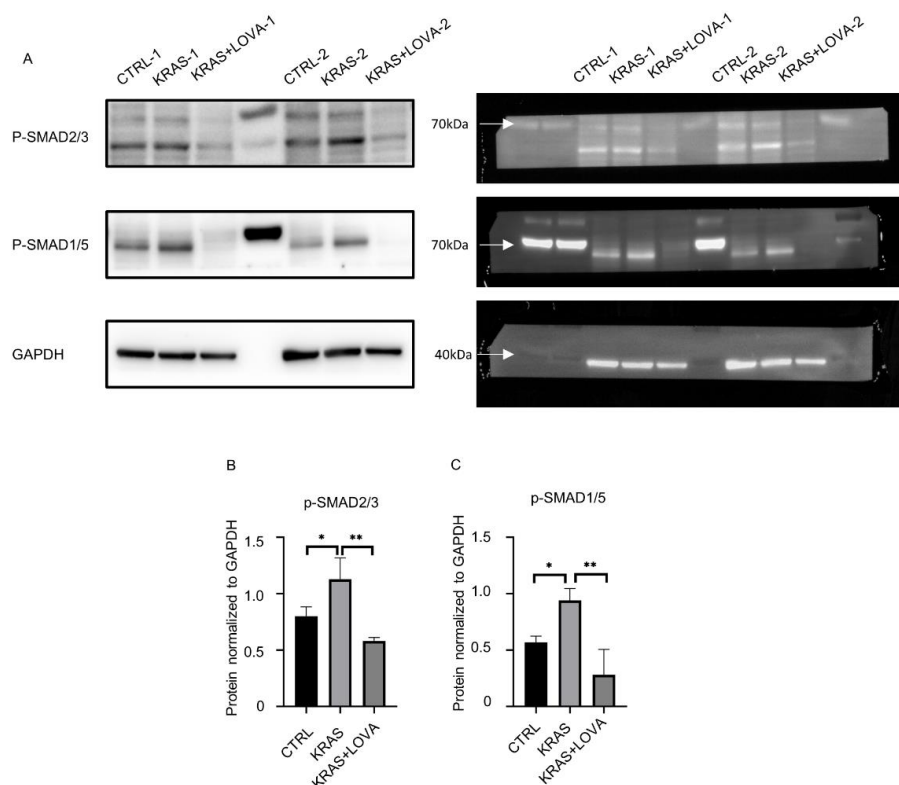

**Figure S17.** Effect of lovastatin (LOVA) on SMAD2/3 and SMAD1/5 Phosphorylation in KRAS mutant HUVECs. **A**, Western blot (left) and full unedited gel (right) image. **B**, quantification showing increased phosphorylation of SMAD2/3 and SMAD1/5 in KRAS mutant HUVECs, which was reversed by lovastatin (KRAS+LOVA). \*:  $p \leq 0.05$ , \*\*:  $p \leq 0.01$ .

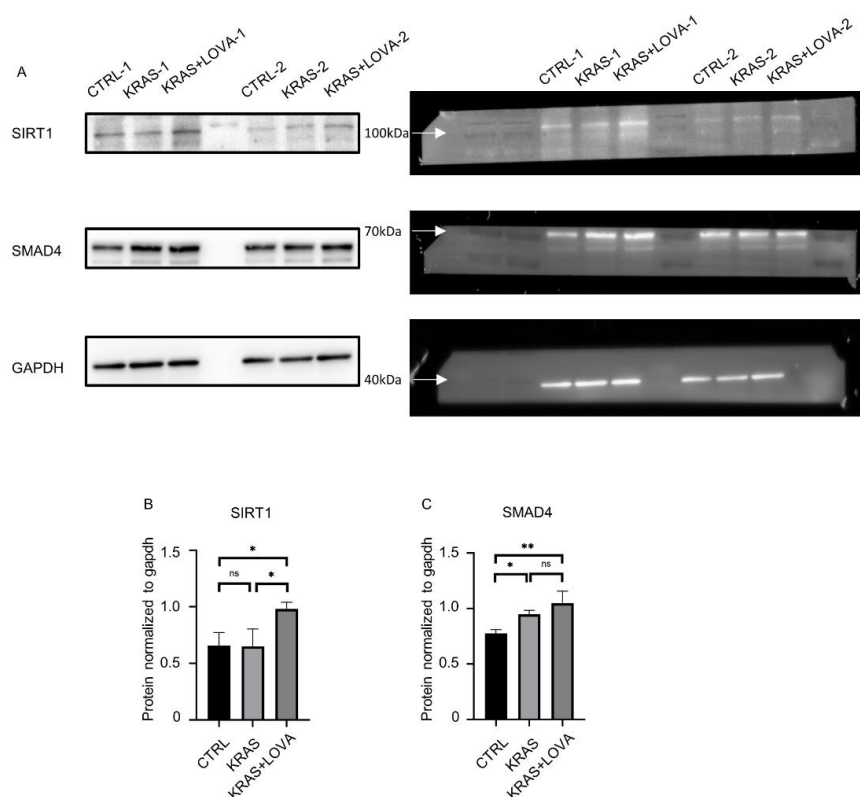

**Figure S18.** Effect of lovastatin (LOVA) on the expression of SIRT1 and SMAD4 in KRAS mutant HUVECs. **A**, Western blot (left) and full unedited gel (right) image. **B**, quantification showing increased level of SIRT1 in KRAS mutant HUVECs treated with lovastatin (KRAS+LOVA). **C**, quantification showing increased level of SMAD4 in KRAS mutation HUVECs and lovastatin had no effect on it. ns:  $p > 0.05$ , \*:  $p \leq 0.05$ , \*\*:  $p \leq 0.01$ .

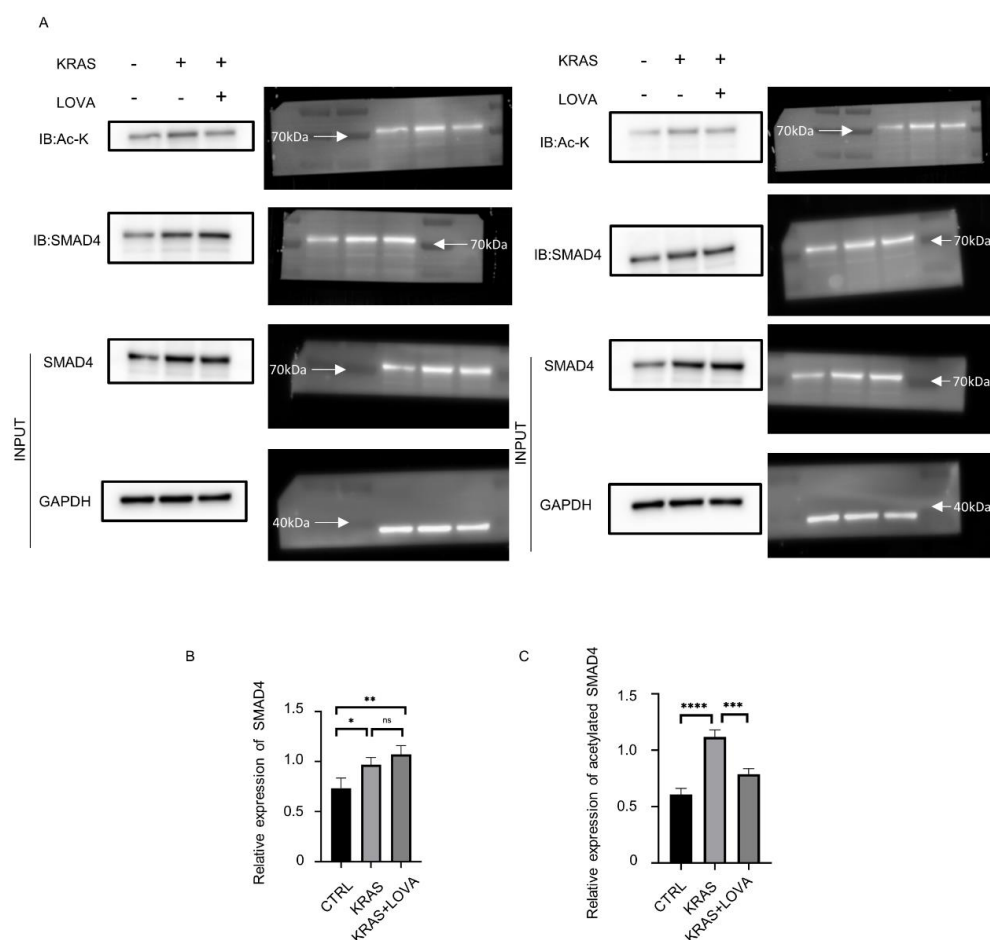

**Figure S19.** Effect of lovastatin (LOVA) on the expression of acetylated SMAD4 in KRAS mutant HUVECs. **A**, Immunoprecipitation of SMAD4 acetylation after lovastatin treatment. **B**, quantification showing lovastatin had no effect on SMAD4 expression in KRAS mutant HUVECs. **C**, quantification showing increased level of acetylated SMAD4 in KRAS mutation HUVECs, which was reversed by lovastatin. ns:  $p > 0.05$ , \*:  $p \leq 0.05$ , \*\*:  $p \leq 0.01$ , \*\*\*:  $p \leq 0.001$ , \*\*\*\*:  $p \leq 0.0001$ .
